# Supplementary material for: Potential Barriers to the Implementation of Computer-Based Simulation in Pharmacy Education: A Systematic Review
Source: MDPI journal article supplement (doi:10.3390/pharmacy11030086), 2023-05-17
Supplement: s1 [file s1]

# PRISMA Checklist

While the PRISMA checklist was initially developed for systematic reviews and meta-analyses, it can be adapted for use in systematic narrative reviews with some justifications. The underlying principles of transparency, rigor, and comprehensiveness in conducting and reporting reviews apply to both types of reviews, making the PRISMA checklist a valuable tool for ensuring high-quality reporting in systematic narrative reviews.

| Section/topic                     | #  | Checklist item                                                                                                                                                                                  | Information reported     |                          | Line number(s) |  |  |  |
|-----------------------------------|----|-------------------------------------------------------------------------------------------------------------------------------------------------------------------------------------------------|--------------------------|--------------------------|----------------|--|--|--|
|                                   |    |                                                                                                                                                                                                 | Yes                      | No                       |                |  |  |  |
| <b>ADMINISTRATIVE INFORMATION</b> |    |                                                                                                                                                                                                 |                          |                          |                |  |  |  |
| <b>Title</b>                      |    |                                                                                                                                                                                                 |                          |                          |                |  |  |  |
| Identification                    | 1a | Identify the document as a protocol of a systematic narrative review                                                                                                                            | Yes                      | <input type="checkbox"/> | 2 - 3          |  |  |  |
| Update                            | 1b | If the protocol is for an update of a previous systematic review, identify as such                                                                                                              | <input type="checkbox"/> | No                       | N/A            |  |  |  |
| <b>Authors</b>                    |    |                                                                                                                                                                                                 |                          |                          |                |  |  |  |
| Contact                           | 2a | Provide name, institutional affiliation, and e-mail address of all protocol authors; provide physical mailing address of corresponding author                                                   | Yes                      | <input type="checkbox"/> | 4 - 8          |  |  |  |
| Contributions                     | 2b | Describe contributions of protocol authors and identify the guarantor of the review                                                                                                             | Yes                      | <input type="checkbox"/> | 451-457        |  |  |  |
| <b>Abstract</b>                   | 3  | Provide a summary to the project                                                                                                                                                                | Yes                      | <input type="checkbox"/> | 9-32           |  |  |  |
| <b>Amendments</b>                 | 4  | If the protocol represents an amendment of a previously completed or published protocol, identify as such and list changes; otherwise, state plan for documenting important protocol amendments | <input type="checkbox"/> | <input type="checkbox"/> | N/A            |  |  |  |
| <b>Support</b>                    |    |                                                                                                                                                                                                 |                          |                          |                |  |  |  |
| Sources                           | 5a | Indicate sources of financial or other support for the review                                                                                                                                   | Yes                      | <input type="checkbox"/> | 458-459        |  |  |  |
| Sponsor                           | 5b | Provide name for the review funder and/or sponsor                                                                                                                                               | <input type="checkbox"/> | <input type="checkbox"/> | N/A            |  |  |  |
| Role of sponsor/funder            | 5c | Describe roles of funder(s), sponsor(s), and/or institution(s), if any, in developing the protocol                                                                                              | <input type="checkbox"/> | <input type="checkbox"/> | N/A            |  |  |  |
| <b>INTRODUCTION</b>               |    |                                                                                                                                                                                                 |                          |                          |                |  |  |  |
| <b>Rationale</b>                  | 6  | Describe the rationale for the review in the context of what is already known                                                                                                                   | Yes                      | <input type="checkbox"/> | 38-73          |  |  |  |
| <b>Objectives</b>                 | 7  | Provide an explicit statement of the question(s) the review will address with reference to participants, interventions, comparators, and outcomes (PICO)                                        | Yes                      | <input type="checkbox"/> | 73-78          |  |  |  |

| Section/topic                                         | #  | Checklist item                                                                                                                                                                                                            | Information reported     |                          | Line number(s)                        |
|-------------------------------------------------------|----|---------------------------------------------------------------------------------------------------------------------------------------------------------------------------------------------------------------------------|--------------------------|--------------------------|---------------------------------------|
|                                                       |    |                                                                                                                                                                                                                           | Yes                      | No                       |                                       |
|                                                       |    |                                                                                                                                                                                                                           |                          |                          |                                       |
| <b>METHODS</b>                                        |    |                                                                                                                                                                                                                           |                          |                          |                                       |
| Protocol registration                                 | 8  | If registered, provide the name of the registry (e.g., PROSPERO) and registration number in the Abstract                                                                                                                  | <input type="checkbox"/> | No                       | N/A                                   |
| Eligibility criteria                                  | 9  | Specify the study characteristics (e.g., PICO, study design, setting, time frame) and report characteristics (e.g., years considered, language, publication status) to be used as criteria for eligibility for the review | Yes                      | <input type="checkbox"/> | 110-118                               |
| Information sources                                   | 10 | Describe all intended information sources (e.g., electronic databases, contact with study authors, trial registers, or other grey literature sources) with planned dates of coverage                                      | Yes                      | <input type="checkbox"/> | 88-96                                 |
| Search strategy                                       | 11 | Present draft of search strategy to be used for at least one electronic database, including planned limits, such that it could be repeated                                                                                | Yes                      | <input type="checkbox"/> | 98-106                                |
| Selection process                                     | 12 | State the process that will be used for selecting studies (e.g., two independent reviewers) through each phase of the review (i.e., screening, eligibility, and inclusion in meta-analysis)                               | Yes                      | <input type="checkbox"/> | 107-109                               |
| Data collection/extraction process                    | 13 | Describe planned method of extracting data from reports (e.g., piloting forms, done independently, in duplicate), any processes for obtaining and confirming data from investigators                                      | Yes                      | <input type="checkbox"/> | 120-132+<br>Supplementary table 1 & 2 |
| Data items                                            | 14 | List and define all variables for which data will be sought (e.g., PICO items, funding sources), any pre-planned data assumptions and simplifications                                                                     | Yes                      | <input type="checkbox"/> | 133-141                               |
| Quality appraisal of included studies (if applicable) | 15 | evaluating the methodological quality, validity, and potential biases in each study included in the review.                                                                                                               | <input type="checkbox"/> | No                       | N/A                                   |
| Narrative synthesis approach                          | 16 | List and define all outcomes for which data will be sought, including prioritization of main and additional outcomes, with rationale                                                                                      | Yes                      | <input type="checkbox"/> | 142-179                               |
| <b>Results</b>                                        |    |                                                                                                                                                                                                                           |                          |                          |                                       |
| Study selection                                       | 17 | the process and outcomes of identifying, screening, and selecting studies for inclusion in the review.                                                                                                                    | Yes                      | <input type="checkbox"/> | 181-186 +<br>Figure 1                 |
| Study characteristics                                 | 18 | a summary of the key features of the studies included in the review.                                                                                                                                                      | Yes                      | <input type="checkbox"/> | 189-205                               |
| Quality appraisal of included studies (if applicable) | 19 | evaluating the methodological quality, validity, and potential biases in each study included in the review.                                                                                                               | <input type="checkbox"/> | No                       | N/A                                   |

| Section/topic                                   | #  | Checklist item                                                                                                                                                                           | Information reported |                          | Line number(s) |
|-------------------------------------------------|----|------------------------------------------------------------------------------------------------------------------------------------------------------------------------------------------|----------------------|--------------------------|----------------|
|                                                 |    |                                                                                                                                                                                          | Yes                  | No                       |                |
| Narrative synthesis of results                  | 20 | findings from the included studies are synthesized, analyzed, and discussed to address the research question(s) or objective(s) of the review.                                           | Yes                  | <input type="checkbox"/> | 208-312        |
| <b>Discussion</b>                               |    |                                                                                                                                                                                          |                      |                          |                |
| Summary of evidence                             | 21 | an overview of the main findings from the review, highlighting the most important and relevant evidence that addresses the research question(s) or objective(s).                         | Yes                  | <input type="checkbox"/> | 313-364        |
| Implications for practice, policy, and research | 22 | bridge the gap between research and practice, providing recommendations and insights that can be applied by practitioners, educators, policymakers, and other stakeholders in the field. | Yes                  | <input type="checkbox"/> | 365-413        |
| Limitations                                     | 23 | Potential weaknesses, shortcomings, or biases in your review.                                                                                                                            | Yes                  | <input type="checkbox"/> | 414-436        |
| <b>Conclusion</b>                               |    |                                                                                                                                                                                          |                      |                          |                |
| Conclusion                                      | 24 | a concise and coherent summary of your main findings, address the research question(s) or objective(s), and emphasize the significance and implications of your review.                  | Yes                  | <input type="checkbox"/> | 437-446        |

#### References:

Liberati A., Altman D.G., Tetzlaff J., et al. The PRISMA statement for reporting systematic reviews and meta-analyses of studies that evaluate healthcare interventions: explanation and elaboration. *BMJ*. 2009;339:b2700.

Moher D., Liberati A., Tetzlaff J., Altman D.G.; PRISMA Group. Preferred reporting items for systematic reviews and meta-analyses: the PRISMA statement. *PLoS Med*. 2009;6(7):e1000097.

Popay J., Roberts H., Sowden A., et al. Guidance on the conduct of narrative synthesis in systematic reviews: a product from the ESRC Methods Programme. Lancaster: Institute of Health Research; 2006.

Green B.N., Johnson C.D., Adams A. Writing narrative literature reviews for peer-reviewed journals: secrets of the trade. *J Chiropr Med*. 2006;5(3):101–17.
