# Supplementary material for: Potential Barriers to the Implementation of Computer-Based Simulation in Pharmacy Education: A Systematic Review
Source: MDPI journal article supplement (doi:10.3390/pharmacy11030086), 2023-05-17
Supplement: s1 [file s1]

## Supplementary Information

*Table S1. Search strategy*

| Serial No. | Database         | Search String                                                                                                                                                                                                                                                                                                                                                                                                                                                                                                                                                                                                                                                                                                                                                                                                                                                                                                                                                                                                                     | Date of Search | Results     |
|------------|------------------|-----------------------------------------------------------------------------------------------------------------------------------------------------------------------------------------------------------------------------------------------------------------------------------------------------------------------------------------------------------------------------------------------------------------------------------------------------------------------------------------------------------------------------------------------------------------------------------------------------------------------------------------------------------------------------------------------------------------------------------------------------------------------------------------------------------------------------------------------------------------------------------------------------------------------------------------------------------------------------------------------------------------------------------|----------------|-------------|
| 1          | Education Source | <i>(computer-based simulation OR pharmacy practice education OR pharmacy education OR online simulation OR virtual simulation OR virtual patient OR serious gaming OR case-based simulation OR standardised patient) AND (DE "Pharmacy Education" OR DE "Simulation" OR DE "Computer Uses in Education" OR DE "Distance Education" OR DE "E-Learning" OR DE "Educational Games" OR DE "Teaching Methods")</i>                                                                                                                                                                                                                                                                                                                                                                                                                                                                                                                                                                                                                     | 4th March 2022 | 487         |
| 2          | Ovid EMBASE      | <i>((computer-based simulation.mp. OR computer simulation.mp. OR online simulation.mp. OR virtual simulation.mp. OR virtual patient.mp. OR serious gaming.mp. OR case-based simulation.mp. OR standardized patient.mp.) AND (pharmacy practice education.mp. OR pharmacy education.mp.))</i><br><br><i>Note: ".mp." stands for "multi-purpose" and searches for terms in multiple fields (e.g. title, abstract, keywords, etc.).</i>                                                                                                                                                                                                                                                                                                                                                                                                                                                                                                                                                                                              | 4th March 2022 | 353         |
| 3          | ERIC             | <i>((("computer-based simulation" OR "online simulation" OR "virtual simulation" OR "serious gaming" OR "case-based simulation" OR "standardized patient") AND ("pharmacy practice education" OR "pharmacy education")) OR "virtual patient") OR "simulated patient") Full Text</i>                                                                                                                                                                                                                                                                                                                                                                                                                                                                                                                                                                                                                                                                                                                                               | 4th March 2022 | 261         |
| 4          | CINAHL           | <i>Search Alert: (((("computer-based simulation"[Title/Abstract] OR "pharmacy practice education"[Title/Abstract] OR "pharmacy education"[Title/Abstract] OR "online simulation"[Title/Abstract] OR "virtual simulation"[Title/Abstract] OR "virtual patient"[Title/Abstract] OR "serious gaming"[Title/Abstract] OR "case-based simulation"[Title/Abstract] OR "standardised patient"[Title/Abstract])) OR (("computer simulation"[MeSH Terms] OR "computer simulation"[Title/Abstract] OR "simulation training"[Title/Abstract] OR "virtual learning"[Title/Abstract] OR "gamification"[Title/Abstract] OR "serious gaming"[MeSH Terms] OR "serious gaming"[Title/Abstract]) AND ("pharmacy education"[MeSH Terms] OR "pharmacy education"[Title/Abstract] OR "pharmacy practice"[MeSH Terms] OR "pharmacy practice"[Title/Abstract]))) AND ("education, pharmacy"[MeSH Terms] OR "education, pharmacy"[Title/Abstract]) Full Text; Published Date: 20000101-20221231 AND Apply equivalent subjects on 2022-03-15 07:28 AM"</i> | 4th March 2022 | 210 results |

|   |                 |                                                                                                                                                                                                                                                                                                                                                                                                                                                                                                                                                                                                                                                                                                                                                                                                                                              |                |                |
|---|-----------------|----------------------------------------------------------------------------------------------------------------------------------------------------------------------------------------------------------------------------------------------------------------------------------------------------------------------------------------------------------------------------------------------------------------------------------------------------------------------------------------------------------------------------------------------------------------------------------------------------------------------------------------------------------------------------------------------------------------------------------------------------------------------------------------------------------------------------------------------|----------------|----------------|
| 5 | Ovid<br>Medline | ALL ( ("Computer Simulation"[Mesh] OR "Models, Educational"[Mesh] OR "Education, Pharmacy"[Mesh] OR "Computer-Assisted Instruction"[Mesh] OR "Teaching"[Mesh]) AND ("Education, Pharmacy"[Mesh] OR "Education, Distance"[Mesh] OR "Patient Simulation"[Mesh] OR "Patient-Centered Care"[Mesh] OR "Problem-Based Learning"[Mesh] OR "Standardized Patients"[Mesh] OR "Video Games"[Mesh] OR "Virtual Reality Exposure Therapy"[Mesh] OR "Virtual Reality"[Mesh])) OR ("Computer Simulation"[tiab] OR "Models, Educational"[tiab] OR "Pharmacy Education"[tiab] OR "Computer simulation"[tiab] OR "Teaching"[tiab] OR "Online Simulation"[tiab] OR "Virtual Simulation"[tiab] OR "Virtual Patient"[tiab] OR "Serious Gaming"[tiab] OR "Case-Based Simulation"[tiab] OR "Standardised Patient"[tiab]) AND ( LIMIT-TO ( LANGUAGE , "English" ) ) | 4th March 2022 | 189<br>results |
|---|-----------------|----------------------------------------------------------------------------------------------------------------------------------------------------------------------------------------------------------------------------------------------------------------------------------------------------------------------------------------------------------------------------------------------------------------------------------------------------------------------------------------------------------------------------------------------------------------------------------------------------------------------------------------------------------------------------------------------------------------------------------------------------------------------------------------------------------------------------------------------|----------------|----------------|

Table S2. Characteristics of the included studies

| Study (Authors and year)                         | Country | Study Focus                                            | Data collection methods/<br>Evaluation methods                                                                       | Participants                              | Computer-based<br>simulation    | Factors identified as barriers<br>(Cultural, Process, and Academic)                                                                                                                                                                                                                                                                                 |
|--------------------------------------------------|---------|--------------------------------------------------------|----------------------------------------------------------------------------------------------------------------------|-------------------------------------------|---------------------------------|-----------------------------------------------------------------------------------------------------------------------------------------------------------------------------------------------------------------------------------------------------------------------------------------------------------------------------------------------------|
| Al-Dahir, Bryant, Kennedy, & Robinson, 2014 [65] | USA     | To evaluate computer simulator as a learning method    | Knowledge-based pre-post-MCQs.<br><br>Evaluative survey - Likert scale                                               | Pharmacy undergraduates at one university | DecisionSim<br>(Formerly vpSim) | <u><b>Cultural barriers</b></u><br><br>Students' attitude/resistance to change [6,12,65]<br><br><u><b>Process barriers</b></u><br><br>1) Time needed by students to complete the exercise [65,67]<br><br>2) extensive case and simulation development time [6,12,66,67,69]<br><br>3) Students and Educators technical support (connectivity) [6,65] |
| Neal Benedict, 2010 [66]                         | USA     | Incorporating effective and active-learning strategies | Knowledge-based questions.<br><br>SOAP (Subjective-objective assessment-plan).<br><br>Post course evaluative survey. | Pharmacy undergraduates at one university |                                 |                                                                                                                                                                                                                                                                                                                                                     |
| Benedict, Schonder, & McGee, 2013 [12]           | USA     | To assess the effectiveness of computer simulation     | Pre and post knowledge quiz<br><br>Final exam scores.                                                                | Pharmacy undergraduates at one university |                                 |                                                                                                                                                                                                                                                                                                                                                     |

|                                                      |     |                                                                                                                               |                                                                                                                                                                                                     |                                                        |            |                                                                                                                                                                                            |
|------------------------------------------------------|-----|-------------------------------------------------------------------------------------------------------------------------------|-----------------------------------------------------------------------------------------------------------------------------------------------------------------------------------------------------|--------------------------------------------------------|------------|--------------------------------------------------------------------------------------------------------------------------------------------------------------------------------------------|
|                                                      |     | and promote self-directed learning                                                                                            | Post-course evaluative survey (Likert scale).                                                                                                                                                       |                                                        |            | 4) (organisation) cost [6,68,69]<br>5) Staff training [6]                                                                                                                                  |
| Lichvar et al., 2016 [67]                            | USA | To design and evaluate the integration of a virtual patient activity.<br><br>And study an effective active-learning strategy. | Pre and post knowledge quiz<br><br>End-of-year exam (to assess knowledge retention)<br><br>Evaluative survey (Likert scale and open-ended questions)                                                | Pharmacy undergraduates at one university              |            | <b><u>Academic barriers</u></b><br><br>1) Curriculum constraints<br><br>Matching the course aim and needs [65]<br><br>2) Motivating and engaging students' needs and expectations [12,68]. |
| Olin & Cole, 2015 [68]                               | USA | To describe computer-based clinical simulation cases (CBCSCs) and review student perceptions of this learning strategy        | Evaluative survey (Likert scale)                                                                                                                                                                    | Pharmacy undergraduates at two campuses                |            |                                                                                                                                                                                            |
| Michael A. Smith, Mohammad, & Benedict, 2014 [6]     | USA | To assess student satisfaction and learning of course objectives                                                              | The post-course survey, and a pre-simulation and post-simulation tests were used to assess student learning                                                                                         | Pharmacy undergraduates at one university              |            |                                                                                                                                                                                            |
| Michael A Smith, Siemianowski, & Benedict, 2016 [69] | USA | To expand the use of virtual patients by sharing case scenarios across two schools                                            | Pre and post-tests assessed student learning, data collected regarding the development and sharing of cases.<br><br>The survey was conducted to measure faculty perception and student satisfaction | Pharmacy undergraduates and 3 educators at two schools |            |                                                                                                                                                                                            |
| Ambroziak, Ibrahim, Marshall, & Kelling, 2018 [7]    | USA | To evaluate a computer simulator and assess the dispensing knowledge                                                          | Post-course survey (with open and closed-ended questions)                                                                                                                                           | Pharmacy undergraduates at one university              | MyDispense | <b><u>Cultural barriers</u></b><br><br>Students' attitude/resistance to change [7,71,72]                                                                                                   |

|                                                           |                              |                                                                                                  |                                                                                                                                                                      |                                                                                            |                                          |                                                                                                                                                                                                                                                                                    |
|-----------------------------------------------------------|------------------------------|--------------------------------------------------------------------------------------------------|----------------------------------------------------------------------------------------------------------------------------------------------------------------------|--------------------------------------------------------------------------------------------|------------------------------------------|------------------------------------------------------------------------------------------------------------------------------------------------------------------------------------------------------------------------------------------------------------------------------------|
| Ferrone, Kebodeaux, Fitzgerald, & Holle, 2017 [70]        | USA                          | To evaluate computer simulator and assess the dispensing knowledge and student perception        | Post-simulation survey (Likert scale and open-ended questions)                                                                                                       | Pharmacy undergraduates at three Universities                                              |                                          | <u>Process barriers</u><br>1) Time needed by students to complete the exercise [4,71,72]<br>2) extensive case and simulation development time [4,7,28,72]<br>3) Software use and updates [4,7,28,70,71]<br>4) Lack of a clear process and procedures and/or faculty expertise [70] |
| Mak, Fitzgerald, Holle, Vordenberg, & Kebodeaux, 2021 [4] | Australia                    | To describes the use of a virtual simulation in enhancing student learning                       | Commentary on “MyDispense” in the didactic and experiential settings to meet educational outcomes and the challenges of virtual simulation                           | Pharmacy undergraduates                                                                    |                                          | <u>Academic barriers</u><br>1) Curriculum constraints (Matching the course aim and needs) [71]<br>2) Motivating and engaging students (Students’ needs and expectations) [72]<br>3) Lack of a clear process and procedures and/or faculty expertise[70]                            |
| McDowell et al., 2016 [28]                                | Australia                    | To develop and evaluate a computer simulator and assess student knowledge                        | Analysis of student examination results and post-course survey                                                                                                       | Pharmacy undergraduates at one university                                                  |                                          |                                                                                                                                                                                                                                                                                    |
| Shin, Tabatabai, Boscardin, Ferrone, & Brock, 2018 [71]   | USA                          | To demonstrate the feasibility of integrating computer simulation and assess student perceptions | pre- and post-tests in class and three surveys (for each phase and overall experience)                                                                               | Pharmacy undergraduates at one university                                                  |                                          |                                                                                                                                                                                                                                                                                    |
| Tai et a;., 2020 [72]                                     | USA                          | Assess student perception and knowledge in introductory pharmacy practice experiences            | Post-course surveys were conducted by students.<br><br>Also, preceptors were asked to complete a survey                                                              | Pharmacy undergraduates and preceptors at one university                                   |                                          |                                                                                                                                                                                                                                                                                    |
| Richardson et al.,, 2019 [93]                             | different European countries | To develop and show proof of concept of the computer-based simulation                            | A blend of formal meetings, distance evaluation (using formal forms and email feedback)<br>Evaluation forms were a mixture of quantitative and qualitative questions | A steering group of European pharmacists provided data for computer simulation development | Keele virtual patient (Keele University) | <u>Cultural barriers</u><br>Educators’ attitude/resistance to change [93]<br><u>Process barriers</u><br>1) Students and Educators                                                                                                                                                  |

|                                  |             |                                                                                                                                 |                                                                                                                                                |                                                             |          |                                                                                                                                                                                                                         |
|----------------------------------|-------------|---------------------------------------------------------------------------------------------------------------------------------|------------------------------------------------------------------------------------------------------------------------------------------------|-------------------------------------------------------------|----------|-------------------------------------------------------------------------------------------------------------------------------------------------------------------------------------------------------------------------|
| Thompson et al., 2020 [8]        | UK          | To evaluate perceptions on the integration, of computer simulator                                                               | Telephone interviews (Semi-structured) to discuss the students' perspectives on the use of the virtual patient or non-interactive case studies | Pharmacy undergraduate (pre-registration) at one university |          | technical support [8]<br><br>2) Software use and updates [8,42,84,93]<br><br>3) Lack of a clear process and procedures and/or faculty expertise [8]                                                                     |
| Thompson et al., 2020 [42]       | UK          | To evaluate virtual patient (VP) and non-interactive (NI) case studies, concerning knowledge, skill, and confidence development | Pre- and post-knowledge quiz. questionnaire (Likert scale and open-ended questions)                                                            | Pharmacy students (preregistered) at one university         |          | <b><u>Academic barriers</u></b><br><br>1) Curriculum constraints (Matching the course aim and needs) [42,93]<br><br>2) Motivating and engaging students<br><br>(Students' needs and expectations) [8,42,84]             |
| Bracegirdle & Chapman, 2010 [84] | UK          | To demonstrate the computer simulator design and report the integration experience                                              | Collective feedback                                                                                                                            | Pharmacy undergraduates at one university                   |          |                                                                                                                                                                                                                         |
| Loke et al., 2010[86]            | New Zealand | To evaluate the learning method using a computer simulator and students' perception                                             | Audio recordings and observations in class Focus groups                                                                                        | Pharmacy undergraduates at one university                   | SimPharm | <b><u>Cultural barriers</u></b><br><br>Educator resistance to change [86]<br><br><b><u>Process barriers</u></b><br><br>1) Time needed by students to complete the exercise [86]<br><br>2) Software use and updates [87] |
| Wright et al., 2020[87]          | New Zealand | To evaluate the knowledge and skills delivered by the computer simulator                                                        | A pre-and post-intervention crossover study design                                                                                             | Practising pharmacists                                      |          | <b><u>Academic barriers</u></b><br><br>- Curriculum constraints (Matching the course aim and needs) [87]                                                                                                                |

|                          |           |                                                                                                          |                                                                                                                                                              |                                               |                                 |                                                                                                                                                                                                                                                                                                                                                                                                                                                                                                                                                          |
|--------------------------|-----------|----------------------------------------------------------------------------------------------------------|--------------------------------------------------------------------------------------------------------------------------------------------------------------|-----------------------------------------------|---------------------------------|----------------------------------------------------------------------------------------------------------------------------------------------------------------------------------------------------------------------------------------------------------------------------------------------------------------------------------------------------------------------------------------------------------------------------------------------------------------------------------------------------------------------------------------------------------|
| Bravo et al., 019 [88]   | Canada    | To assess students' perceptions using a computer simulation                                              | a semi-structured interview conducted by VIC's project team members.<br><br>The interviews were audio-recorded, transcribed, and coded for extracting themes | Pharmacy undergraduates from one university   | Virtual Interactive Case System | <u><b>Cultural barriers</b></u><br><br>Students' attitude/resistance to change [89]<br><br><u><b>Process barriers</b></u><br><br>1) Time needed by students to complete the exercise [88]<br><br>2) Students and Educators technical support [88]<br><br>3) Lack of a clear process and procedures and/or faculty expertise [88,89]<br><br><u><b>Academic barriers</b></u><br><br>1) Curriculum constraints<br><br>(Matching the course aim and needs) [88]<br><br>2) Motivating and engaging students<br><br>(Students' needs and expectations) [88,89] |
| Dahri et al., 2019[89]   | Canada    | To investigate students' perceptions towards computer simulation                                         | Post-course survey and focus group participation                                                                                                             | Pharmacy undergraduates at one university     |                                 |                                                                                                                                                                                                                                                                                                                                                                                                                                                                                                                                                          |
| Bindoff et al.,2014 [82] | Australia | To present and evaluate the computer simulator's effectiveness and actively engaging learning experience | Pre and post knowledge quiz<br><br>Evaluative survey<br><br>(Likert scale and open-ended questions)                                                          | Pharmacy undergraduates from one university   | Pharmacy Simulator              | <u><b>Cultural barriers</b></u><br><br>1) Educators' attitude/resistance to change [82]<br><br>2) Students' attitude/resistance to change [82]<br><br><u><b>Process barriers</b></u><br><br>1) Software use and updates<br><br>Design limitation [82,83]<br><br>2) Lack of a clear process and procedures and/or faculty expertise [83]                                                                                                                                                                                                                  |
| Tait et al.,2018 [83]    | Australia | To investigate perception and experience using computer simulation                                       | A post-simulation questionnaire                                                                                                                              | Master of Pharmacy students at one university |                                 |                                                                                                                                                                                                                                                                                                                                                                                                                                                                                                                                                          |

|                                         |           |                                                                      |                                                                                                                         |                                                  |                                           |                                                                                                                                                                                                                                                                                                                                                                                                                                                     |
|-----------------------------------------|-----------|----------------------------------------------------------------------|-------------------------------------------------------------------------------------------------------------------------|--------------------------------------------------|-------------------------------------------|-----------------------------------------------------------------------------------------------------------------------------------------------------------------------------------------------------------------------------------------------------------------------------------------------------------------------------------------------------------------------------------------------------------------------------------------------------|
|                                         |           |                                                                      |                                                                                                                         |                                                  |                                           | <u><b>Academic barriers</b></u><br><br>1) Curriculum constraints (Matching the course aim and needs) [82,83]<br><br>2) Motivating and engaging students (Students needs and expectations) [82]                                                                                                                                                                                                                                                      |
| Zary, Johnson, Boberg, & Fors, 2006 [9] | Sweden    | To evaluate a computer simulator                                     | Post-course surveys and on-site observations were performed when possible.<br><br>(Likert scale and free text comments) | Medicine, dental and pharmacy undergraduates     | Web-based Simulation of Patients (Web-SP) | <u><b>Cultural barriers</b></u><br><br>Students' attitude/resistance to change [89].<br><br><u><b>Process barriers</b></u><br><br>1) Extensive case and simulation development time [9]<br>2) Software use and updates/Design limitation [9]<br>3) Lack of a clear process and procedures and/or faculty expertise [9]<br>4) Cost [9]<br><br><u><b>Academic barriers</b></u><br><br>Curriculum constraints (Matching the course aim and needs) [88] |
| Marriott, 2007 [3]                      | Australia | To assess and evaluate a computer simulator's use as a learning tool | Post-assessment survey) to determine the program's ease of use and its perceived value                                  | Pharmacy undergraduates at one School/University | A purpose-designed computer program       | <u><b>Cultural barriers</b></u><br><br>Students' attitude/resistance to change [89]<br><br><u><b>Process barriers</b></u><br><br>1) Extensive case and simulation development time [9]<br>2) Software use and updates/Design limitation [9]                                                                                                                                                                                                         |
| Marriott, 2007 [79]                     | Australia | To assess and evaluate a computer simulator's use as a learning tool | Review of the software design, features, and functions                                                                  | Pharmacy undergraduates at one School/University |                                           |                                                                                                                                                                                                                                                                                                                                                                                                                                                     |

|                                                 |     |                                                                                            |                                                                                                                                                                                                                                                                           |                                                                      |             |                                                                                                                                                                                                                                                                                                                                                                                                                                                                     |
|-------------------------------------------------|-----|--------------------------------------------------------------------------------------------|---------------------------------------------------------------------------------------------------------------------------------------------------------------------------------------------------------------------------------------------------------------------------|----------------------------------------------------------------------|-------------|---------------------------------------------------------------------------------------------------------------------------------------------------------------------------------------------------------------------------------------------------------------------------------------------------------------------------------------------------------------------------------------------------------------------------------------------------------------------|
|                                                 |     |                                                                                            |                                                                                                                                                                                                                                                                           |                                                                      |             | <p>3) Lack of a clear process and procedures and/or faculty expertise [9,79]</p> <p>4) Cost [9]</p> <p><b><u>Academic barriers</u></b></p> <p>- Curriculum constraints (matching the course aim and needs) [88]</p>                                                                                                                                                                                                                                                 |
| Caylor, Aebersold, Lapham, & Carlson, 2015 [73] | USA | to examine the use and effectiveness of computer simulation in multi-professional learning | <p>Pre and post IPE</p> <p>Perception Scale (Likert scale)</p> <p>Pre and post teamwork</p> <p>Questionnaire (Likert scale)</p> <p>Team Performance</p> <p>Observation Tool – Faculty members</p> <p>Post-course evaluative survey. (Likert scale and open-ended Q's)</p> | Undergraduates in nursing, medicine, and pharmacy at same University | Second Life | <p><b><u>Process barriers</u></b></p> <p>1) extensive case and simulation development time [73]</p> <p>2) Software use and updates/Design limitation<br/>Technical issues – awkward navigation [73]</p> <p>3) Unclear process and procedures [73]</p> <p>4) Cost (organisation) [73]</p> <p><b><u>Academic barriers</u></b></p> <p>Curriculum constraints</p> <p>(Matching the course aim and needs (matching the need for interdisciplinary requirements))[73]</p> |
| Benedict & Schonder, 2011[39]                   | USA | To implement and assess the effectiveness of a computer simulation in teaching             | <p>Pre and post knowledge quiz</p> <p>Final exam scores</p> <p>Post-course evaluative survey (Likert scale)</p>                                                                                                                                                           | Pharmacy undergraduates from one university                          | PharmaCAL   | <p><b><u>Process barriers</u></b></p> <p>1) Extensive case and simulation development time [39]</p> <p>2) Software use and updates [39]</p> <p>4) Cost [39]</p> <p><b><u>Academic barriers</u></b></p>                                                                                                                                                                                                                                                              |



|                                     |          |                                                                  |                                                                                                              |                                           |                                        |                                                                                                                                                                                                                                                                                                                                                                                                                                                                                                                                                                                                                                                 |
|-------------------------------------|----------|------------------------------------------------------------------|--------------------------------------------------------------------------------------------------------------|-------------------------------------------|----------------------------------------|-------------------------------------------------------------------------------------------------------------------------------------------------------------------------------------------------------------------------------------------------------------------------------------------------------------------------------------------------------------------------------------------------------------------------------------------------------------------------------------------------------------------------------------------------------------------------------------------------------------------------------------------------|
|                                     |          |                                                                  |                                                                                                              |                                           |                                        | - Motivating and engaging students (students' needs and expectations) [39]                                                                                                                                                                                                                                                                                                                                                                                                                                                                                                                                                                      |
| Chaikoolvatana & Goodyer, 2003 [85] | UK       | To validate a computer simulator design and its use for learning | Care plan developed by students<br>Face-to-face consultation<br>Post-course evaluative survey (Likert scale) | Pharmacy undergraduates at one university | Multimedia case history program (MCHP) | <u><b>Process barriers</b></u><br>1) extensive case and simulation development time [85]<br>2) Software use and updates - Design limitation [85]                                                                                                                                                                                                                                                                                                                                                                                                                                                                                                |
| Cláudio et al., 2015 [97]           | Portugal | To present and evaluate computer simulation as a learning tool   | Evaluative survey (Likert scale and open-ended questions)                                                    | Seven qualified pharmacists               | Virtual Human                          | <u><b>Cultural barriers</b></u><br>1) Educators' attitude/resistance to change (cannot fully replace students' assessment traditional method) [97]<br>2) Students' attitude/resistance to change [97]<br><u><b>Process barriers</b></u><br>1) extensive case and simulation development time [97]<br>2) Software use and updates - Design limitation [97]<br><u><b>Academic barriers</b></u><br>1) Motivating and engaging students<br>(Students' needs and expectations) [97]<br>2) Curriculum constraints(Matching the course aim and needs, as it lacks active listening or emphatic capacity in a true community pharmacy environment) [97] |

|                                                   |     |                                                                                                              |                                                                                                                                        |                                                                   |                                                                           |                                                                                                                                                                                                                                                                                                                                                                                       |
|---------------------------------------------------|-----|--------------------------------------------------------------------------------------------------------------|----------------------------------------------------------------------------------------------------------------------------------------|-------------------------------------------------------------------|---------------------------------------------------------------------------|---------------------------------------------------------------------------------------------------------------------------------------------------------------------------------------------------------------------------------------------------------------------------------------------------------------------------------------------------------------------------------------|
| Ma, Finn, Czosnowski, Whitman, & Cawley, 2011 [5] | USA | To assess the impact of the computer simulation on student knowledge during another mannequin-based exercise | Post simulation survey with questions included demographic information, computer simulation scores, and satisfaction-related questions | Pharmacy undergraduates at one university                         | MicroSim                                                                  | <p><b><u>Cultural barriers</u></b></p> <p>Students' attitude/resistance to change [5]</p> <p><b><u>Process barriers</u></b></p> <p>1) extensive case and simulation development time [5]</p> <p>2) Software use and updates/Design limitation [5]</p> <p>3) Cost [5]</p> <p><b><u>Academic barriers</u></b></p> <p>Curriculum constraints (Matching the course aim and needs) [5]</p> |
| Douglass, Casale, Skirvin, & DiVall, 2013 [74]    | USA | To implement and assess the impact of computer simulation on students' knowledge and skills                  | <p>Pre and post-test for evaluating clinical competence.</p> <p>Post-course evaluative survey.(Likert scale)</p>                       | Pharmacy undergraduates at one university                         | TheraSim                                                                  | <p><b><u>Cultural barriers</u></b></p> <p>Students' attitude/resistance to change [74]</p> <p><b><u>Process barriers</u></b></p> <p>1) extensive case and simulation development time [74]</p> <p>2) Software use and updates/Design limitation [74]</p> <p>3) Cost (organisation) [74]</p>                                                                                           |
| Hussein & Kawahara, 2006 [75]                     | USA | To promote active learning and knowledge                                                                     | <p>Knowledge assessed based on</p> <p>1) the care plan and messages left on the telephone</p> <p>2) Final knowledge exam</p>           | Pharmacy undergraduates and six faculty members at one university | Computer telephony interactive voice response system (IVR) and a text-to- | <p><b><u>Cultural barriers</u></b></p> <p>Students' attitude/resistance to change [75]</p> <p><b><u>Process barriers</u></b></p> <p>1) Extensive case and simulation development time [75]</p>                                                                                                                                                                                        |

|                                           |                      |                                                                                       |                                                                                                                                                  |                                                                                       |                                                                   |                                                                                                                                                                                                                                                                                                                                                                                                                      |
|-------------------------------------------|----------------------|---------------------------------------------------------------------------------------|--------------------------------------------------------------------------------------------------------------------------------------------------|---------------------------------------------------------------------------------------|-------------------------------------------------------------------|----------------------------------------------------------------------------------------------------------------------------------------------------------------------------------------------------------------------------------------------------------------------------------------------------------------------------------------------------------------------------------------------------------------------|
|                                           |                      |                                                                                       | <p>Educators' evaluative survey (Likert scale)</p> <p>Students' evaluative survey (Likert scale and open-ended questions)</p>                    |                                                                                       | <p>speech (TTS) system</p>                                        | <p>2) Software use and updates/Design limitation [75]</p> <p>3) Cost (organisation) [75]</p> <p><b><u>Academic barriers</u></b></p> <p>1) Motivating and engaging students [75]</p> <p>2) Lack of a clear process and procedures and/or faculty expertise [75]</p>                                                                                                                                                   |
| Fens, Dantuma- Wering, & Taxis, 2020 [91] | Netherlands          | To present and evaluate a computer simulation and assess a wide range of competencies | <p>Students are assessed individually and as a pharmacy team.</p> <p>(The pharmacy team, with the largest number of patients, wins the game)</p> | Postgraduate pharmacy students at three universities (Groningen, Utrecht, and Leiden) | <p>Pharmacy Game</p> <p>Previously known as "GIMMICS/ PharmG"</p> | <p><b><u>Process barriers</u></b></p> <p>Software use and updates/Design limitations (Different programs needed to run the simulation) [91].</p> <p>Utilising Microsoft applications that allow sharing documents, audio, and video calls (Human to human) interaction</p>                                                                                                                                           |
| Lim et al., 2020 [92]                     | Australia & Malaysia | To assess knowledge and perceptions among students using a computer simulator         | Self-administered questionnaire and focus group                                                                                                  | Pharmacy undergraduates at two campuses.                                              | <p>The Monash OSCE Virtual Experience (MOVE)</p>                  | <p><b><u>Cultural barriers</u></b></p> <p>1) Scepticism [92].</p> <p>2) Students' attitude/resistance to change [92]</p> <p><b><u>Process barriers</u></b></p> <p>1) Software use/access [92]</p> <p>2) Lack of a clear process and procedures (usability and training issues) [92]</p> <p><b><u>Academic barriers</u></b></p> <p>1) Motivating and engaging students [92]</p> <p>2) Curriculum constraints [92]</p> |

|                                            |           |                                                                                               |                                                                                                                                                                                                                        |                                               |                              |                                                                                                                                                                                                                                                                                                                                                                                                                                      |
|--------------------------------------------|-----------|-----------------------------------------------------------------------------------------------|------------------------------------------------------------------------------------------------------------------------------------------------------------------------------------------------------------------------|-----------------------------------------------|------------------------------|--------------------------------------------------------------------------------------------------------------------------------------------------------------------------------------------------------------------------------------------------------------------------------------------------------------------------------------------------------------------------------------------------------------------------------------|
| J. Marriott, Styles, & McDowell, 2012 [80] | Australia | To present a computer simulator and the integration experience within teaching the curriculum | <p>Post-course students' feedback survey for two consecutive years.</p> <p>A student focus group discussion was conducted.</p> <p>A comprehensive evaluation was undertaken of staff and student use of Pharmville</p> | Pharmacy undergraduates                       | Pharmville                   | <p><b><u>Process barriers</u></b></p> <p>1) extensive case and simulation development time [80]</p> <p>2) Software use and updates/Design limitation [80]</p> <p><b><u>Academic barriers</u></b></p> <p>1) Motivating and engaging students</p> <p>2) Curriculum constraints - implement Pharmville activities (course design) [80]</p> <p>- Need to meet accreditation standards [80]</p> <p>3) Lack of faculty expertise [80].</p> |
| Menendez et al., 2015 [90]                 | Brazil    | To present and evaluate computer simulation in teaching                                       | Post-course surveys and on-site observations were performed when possible                                                                                                                                              | Pharmacy undergraduates at one university     | PharmaVP                     | <p><b><u>Cultural barriers</u></b></p> <p>(Scepticism) students' attitude/resistance to change [90]</p> <p><b><u>Process barriers</u></b></p> <p>1) Software use and updates/Design limitation [90]</p> <p><b><u>Academic barriers</u></b></p> <p>1) Motivating and engaging students [90]</p>                                                                                                                                       |
| Park & Summons, 2013 [81]                  | Australia | To present a computer simulator and students' perceptions                                     | Evaluative survey – Likert scale                                                                                                                                                                                       | Pharmacy undergraduates at three universities | The Virtual Pharmacy Patient | <p><b><u>Process barriers</u></b></p> <p>Software use and updates/Design limitation [81]</p> <p><b><u>Academic barriers</u></b></p> <p>Motivating and engaging students [81]</p>                                                                                                                                                                                                                                                     |

|                                                            |     |                                                                                                |                                                                                                                                                                                                                                                                                                                                           |                                           |                                                         |                                                                                                                                                                                                                                                                                                                                                                                                                           |
|------------------------------------------------------------|-----|------------------------------------------------------------------------------------------------|-------------------------------------------------------------------------------------------------------------------------------------------------------------------------------------------------------------------------------------------------------------------------------------------------------------------------------------------|-------------------------------------------|---------------------------------------------------------|---------------------------------------------------------------------------------------------------------------------------------------------------------------------------------------------------------------------------------------------------------------------------------------------------------------------------------------------------------------------------------------------------------------------------|
| Taglieri, Crosby, Zimmerman, Schneider, & Patel, 2017 [76] | USA | To assess the effect of incorporating Computer simulation on student competence and confidence | Pre-survey, interim survey, post-survey (Likert scale and open-ended questions)<br><br>Performance in mock clinic                                                                                                                                                                                                                         | Pharmacy undergraduates at one university | Shadow Health Digital Clinical Experience (DCE)         | <p><b><u>Cultural barriers</u></b></p> <p>Students' attitude/resistance to change [76]</p> <p><b><u>Process barriers</u></b></p> <p>1) Software use and updates/Design limitation [76]<br/>2) Cost (organisation) [76]</p> <p><b><u>Academic barriers</u></b></p> <p>1) Curriculum constraints<br/>(Course Accreditation/course needs and aims) [76]<br/>2) Motivating and engaging students [76]</p>                     |
| Villaume, Berger, & Barker, 2006 [77]                      | USA | To assess students' knowledge using computer simulation                                        | Post assignment survey was conducted to collect feedback regarding students' experiences with the tool.<br><br>Knowledge test (by a number of MCQs as part of the final examination to examine students' knowledge retention and efficiency of incorporating the tool. Students' script for VP - graded final exam – Knowledge retention. | Pharmacy undergraduates                   | The Auburn University Virtual Patient (AUPV) simulation | <p><b><u>Cultural barriers</u></b></p> <p>Students' attitude/resistance to change[77]</p> <p><b><u>Process barriers</u></b></p> <p>1) extensive simulation development time and knowledge [77]<br/>2) Software use and updates/Design limitation [77]</p> <p><b><u>Academic barriers</u></b></p> <p>1) Motivating and engaging students [77]<br/>2) Curriculum constraints [77]<br/>3) Lack of faculty expertise [77]</p> |

|                                                               |        |                                                                                                                                        |                                                                                                                                                           |                                                                                                                                                 |                                                                                                                                          |                                                                                                                                                                                                                                                                                                                                                                                                                                                                                                                                                                                                      |
|---------------------------------------------------------------|--------|----------------------------------------------------------------------------------------------------------------------------------------|-----------------------------------------------------------------------------------------------------------------------------------------------------------|-------------------------------------------------------------------------------------------------------------------------------------------------|------------------------------------------------------------------------------------------------------------------------------------------|------------------------------------------------------------------------------------------------------------------------------------------------------------------------------------------------------------------------------------------------------------------------------------------------------------------------------------------------------------------------------------------------------------------------------------------------------------------------------------------------------------------------------------------------------------------------------------------------------|
| Battaglia, Kieser, Bruskiewitz, Pitterle, & Thorpe, 2012 [78] | USA    | To present the development, implementation, and assess the effectiveness of computer simulation                                        | Pre and post assessment (Likert scale, multiple choice questions (MCQs) and short answer questions)                                                       | Pharmacists (42) and pharmacy students at one university                                                                                        | Virtual patient training via the online Moodle platform                                                                                  | <p><b><u>Process barriers</u></b></p> <p>1) Software use and updates/Design limitation [78]</p> <p>2) Usability of the software (access and procedures) [78]</p> <p><b><u>Academic barriers</u></b></p> <p>1) Motivating and engaging students[78]</p> <p>2) Lack of faculty expertise [78]</p>                                                                                                                                                                                                                                                                                                      |
| Cavaco & Madeira, 2012 [35]                                   | Europe | To describe how virtual patients are being used to simulate real-life clinical scenarios in undergraduate pharmacy education in Europe | Exploratory cross-sectional survey regarding the use of computer-based simulations, perceptions of computer-based simulations in education (Likert scale) | <p>Pharmacy undergraduates at European Pharmacy</p> <p>Students Association (EPSA) Annual Congress, 2011 (23 countries and 46 Universities)</p> | <p>The different computer-based virtual simulations used across Europe</p> <p>(Depends on students' individual encounter/experience)</p> | <p><b><u>Cultural barriers</u></b></p> <p>1) Lack of collaboration bet. Local market and educational institute [35]</p> <p>2) Resistance to change (organisation) [35]</p> <p>3) Resistance to change (Educators) [35]</p> <p><b><u>Process barriers</u></b></p> <p>1) Software use and updates/Design limitation [35]</p> <p>2) Cost (organisation) [35]</p> <p>3) Lack of a clear process and procedures [35]</p> <p><b><u>Academic barriers</u></b></p> <p>1) Curriculum constraints</p> <p>(Course Accreditation/course needs and aims) [35]</p> <p>2) Motivating and engaging students [35]</p> |

TableS3. Characteristics of the included grey literature (AACODS)

| (Authors, publication year, study title)                 | Authority                                    | Accuracy                                                                                                                                                                                                                                                                                                                                                                                                          | Coverage                                                                                                 | Objectivity                                                                                               | Date                                                                                                                                                                                                                                               | Significance                                                                                                                                                                                         | Comments on Implementing computer-based, virtual simulation in pharmacy education                                                                                                                                                                                                                                                                                                                                                                                                                                                                     |
|----------------------------------------------------------|----------------------------------------------|-------------------------------------------------------------------------------------------------------------------------------------------------------------------------------------------------------------------------------------------------------------------------------------------------------------------------------------------------------------------------------------------------------------------|----------------------------------------------------------------------------------------------------------|-----------------------------------------------------------------------------------------------------------|----------------------------------------------------------------------------------------------------------------------------------------------------------------------------------------------------------------------------------------------------|------------------------------------------------------------------------------------------------------------------------------------------------------------------------------------------------------|-------------------------------------------------------------------------------------------------------------------------------------------------------------------------------------------------------------------------------------------------------------------------------------------------------------------------------------------------------------------------------------------------------------------------------------------------------------------------------------------------------------------------------------------------------|
| Reports                                                  |                                              |                                                                                                                                                                                                                                                                                                                                                                                                                   |                                                                                                          |                                                                                                           |                                                                                                                                                                                                                                                    |                                                                                                                                                                                                      |                                                                                                                                                                                                                                                                                                                                                                                                                                                                                                                                                       |
| (Accreditation Council for Pharmacy Education, 2015) [2] | Accreditation Council for Pharmacy Education | <p>High-quality education standard.</p> <p>Accurate consideration of the expansion of pharmacy education scope</p> <p>Detailed updates:</p> <p>Educational outcomes,</p> <p>Structure</p> <p>Procedures</p> <p>Assessment of standards</p> <p>Reports from other bodies and institutes “e.g., IOM, AACP, JCPP, AACN”</p> <p>Previous feedback from ACPE stakeholders</p> <p>Updates regarding (state laws and</p> | <p>Standards in quality pharmacy education</p> <p>Continuous updating and guidance to best practices</p> | <p>Changes and challenges in pharmacy education</p> <p>Discussing the needs of different stakeholders</p> | <p>Standards for the year 2016 (which is the most recent report from ACPE)</p> <p>This document is regularly revised and forms the basis for the most updated versions (version 2) of rubrics used till this year 2021 in accreditation visits</p> | <p>Insight into educational needs.</p> <p>Different stakeholders stand</p> <p>It directly affects policy-making decisions.</p> <p>Guides the decision makers’ priorities in curriculum standards</p> | <p>Students should have (The knowledge, skills, and abilities to provide patient-centred care and solve problems)</p> <p>Emphasis on introductory pharmacy practice experiences (IPPE)</p> <p>Simulations are not intended to replace direct-patient experiences</p> <p>Simulated practice experiences (a maximum of 60 clock hours of the total 300 hours)</p> <p>Simulation hours do not substitute for the required IPPE time</p> <p>Importance of availability of dedicated resources (faculty)</p> <p>Relevance to course aim and objectives</p> |

|                                                                                                |                                              |                                                                                                                                                                                                     |                                                                                                                                    |                                                                                                                                                                                                                        |                                                                                                                                                                      |                                                                                                                                                                                                                                           |                                                                                                                                                                                                                                                                                                                                                                                                                                                                                                                                                                     |
|------------------------------------------------------------------------------------------------|----------------------------------------------|-----------------------------------------------------------------------------------------------------------------------------------------------------------------------------------------------------|------------------------------------------------------------------------------------------------------------------------------------|------------------------------------------------------------------------------------------------------------------------------------------------------------------------------------------------------------------------|----------------------------------------------------------------------------------------------------------------------------------------------------------------------|-------------------------------------------------------------------------------------------------------------------------------------------------------------------------------------------------------------------------------------------|---------------------------------------------------------------------------------------------------------------------------------------------------------------------------------------------------------------------------------------------------------------------------------------------------------------------------------------------------------------------------------------------------------------------------------------------------------------------------------------------------------------------------------------------------------------------|
|                                                                                                |                                              | expansion of pharmacy role and scope)                                                                                                                                                               |                                                                                                                                    |                                                                                                                                                                                                                        |                                                                                                                                                                      |                                                                                                                                                                                                                                           |                                                                                                                                                                                                                                                                                                                                                                                                                                                                                                                                                                     |
| (Accreditation Council for Pharmacy Education, 2020)<br><br>[18]                               | Accreditation Council for Pharmacy Education | <p>Clarify the standards</p> <p>Explain the accreditation process for ACPE</p> <p>Explains the role of simulation in accredited programs</p>                                                        | <p>Accurate coverage of the report aims</p> <p>Highlighting the role of different key factors within the accreditation process</p> | <p>Various updates and feedback (From different stakeholders)</p> <p>The accreditation process step by step</p> <p>Standards and procedures for implementing simulation</p>                                            | <p>Up-to-date standards and procedure reports, completed in January 2021</p> <p>Mainly referencing the accreditation standards in the ACPE standards report 2016</p> | <p>Regulates the relationship between ACPE and the pharmacy program of a given institute</p> <p>ACPE standards ensure high education standards</p> <p>Keep stakeholders up to date on the most recent challenges</p>                      | <p>Acceptable and non-acceptable activities for pharmacy simulation set by ACPE</p> <p>Role of simulation to complement traditional training methods</p> <p>Standards for using and integrating simulation into pharmacy curriculum</p>                                                                                                                                                                                                                                                                                                                             |
| (Accreditation Standards for Pharmacy Programs in Australia and New Zealand, 2020)<br><br>[64] | The Australian Pharmacy Council (APC)        | <p>Safe and socially accountable practice</p> <p>Governance and quality</p> <p>Program (Design, implementation, and resourcing)</p> <p>Student/intern experience</p> <p>Outcomes and assessment</p> | <p>assure the quality of pharmacy education programs and promote further improvement in their quality.</p>                         | <p>Used as the basis for the accreditation of degree programs in both Australia and New Zealand</p> <p>N.B. separate Accreditation Standards exist for intern training programs (ITP) in Australia and New Zealand</p> | <p>Up-to-date standards and procedure reports, effective from 1 January 2020</p>                                                                                     | <p>Ensure that graduates of degree programs and applicants for initial general registration meet all of the competencies required for practice under supervision as an intern, and unsupervised practice as a pharmacist respectively</p> | <p>There is no requirement for engagement in real environments (but highly desirable), however, providers should describe how the simulated environments they use to prepare students/interns for real experience</p> <p>(As seen in Criterion 3.8)</p> <p>“simulation is not limited to interprofessional learning but was identified in a 2010 Health Workforce Australia report as a particularly useful approach where direct interprofessional experience is not readily available” (It is also an expectation of the Pharmacy Action Plan in New Zealand)</p> |



|                                                                                                                  |                                                                          |                                                                                                                                                              |                                                                                                                                                     |                                                                                    |                                                                                       |                                                                                                                                                                                                                                        |                                                                                                                                                                                                                                                                                                                                                                                                                                                                                                                                                                                                                                                                                                                                                                     |
|------------------------------------------------------------------------------------------------------------------|--------------------------------------------------------------------------|--------------------------------------------------------------------------------------------------------------------------------------------------------------|-----------------------------------------------------------------------------------------------------------------------------------------------------|------------------------------------------------------------------------------------|---------------------------------------------------------------------------------------|----------------------------------------------------------------------------------------------------------------------------------------------------------------------------------------------------------------------------------------|---------------------------------------------------------------------------------------------------------------------------------------------------------------------------------------------------------------------------------------------------------------------------------------------------------------------------------------------------------------------------------------------------------------------------------------------------------------------------------------------------------------------------------------------------------------------------------------------------------------------------------------------------------------------------------------------------------------------------------------------------------------------|
| <p>(Raehl, C.L., Baldwin, J.N., Carter, R.A., Crabtree, B.L., Yanchick, V.A., Maine, L.L., 2013)</p> <p>[63]</p> | <p>The American Association of Colleges of Pharmacy Argus Commission</p> | <p>This report aims to</p> <p>Identify five sectors that would affect pharmacy education in future</p> <p>Discuss expected changes to pharmacy education</p> | <p>Game changers in pharmacy education</p> <p>(It doesn't enforce any policy change but rather discusses challenges and offers recommendations)</p> | <p>Carefully discussed</p> <p>Logically analysed</p> <p>Set of recommendations</p> | <p>Clearly stated the date (2012-2013) and a detailed list of the used references</p> | <p>High-ranked decision makers involved</p> <p>Expected change in pharmacy education</p> <p>Systematic analysis of the presented ideas</p> <p>Set of recommendations that is thought to help AACP members to decide their policies</p> | <p>Active engagement with different stakeholders</p> <p>Promote a joint independent entity that combines all stakeholders to facilitate collaboration</p> <p>The proposed policy statements and set of recommendations:</p> <p>In Policy statement #1,</p> <p>a) AACP encourages meeting stakeholders' needs and engaging them in decision-making,</p> <p>b) link academia to market needs and</p> <p>c) explore education style preferences among students</p> <p>In policy statement #2,</p> <p>AACP encourages its members to adopt and adapt to new changes (flexible and supportive culture)</p> <p>-In policy statement #3,</p> <p>AACP encourages its members to study the best adoption strategy to ensure the successful utilisation of new technology</p> |
|------------------------------------------------------------------------------------------------------------------|--------------------------------------------------------------------------|--------------------------------------------------------------------------------------------------------------------------------------------------------------|-----------------------------------------------------------------------------------------------------------------------------------------------------|------------------------------------------------------------------------------------|---------------------------------------------------------------------------------------|----------------------------------------------------------------------------------------------------------------------------------------------------------------------------------------------------------------------------------------|---------------------------------------------------------------------------------------------------------------------------------------------------------------------------------------------------------------------------------------------------------------------------------------------------------------------------------------------------------------------------------------------------------------------------------------------------------------------------------------------------------------------------------------------------------------------------------------------------------------------------------------------------------------------------------------------------------------------------------------------------------------------|
